# Supplementary material
Source: PubMed Central journal article supplement (PMC4761465)
Supplement: NIHMS748665-supplement-1.pdf [file NIHMS748665-supplement-1.pdf]

***PTPN22* modifies regulatory T cell homeostasis via GITR upregulation**

Dominika J. Nowakowska and Stephan Kissler

**Supplemental Figures S1 and S2**

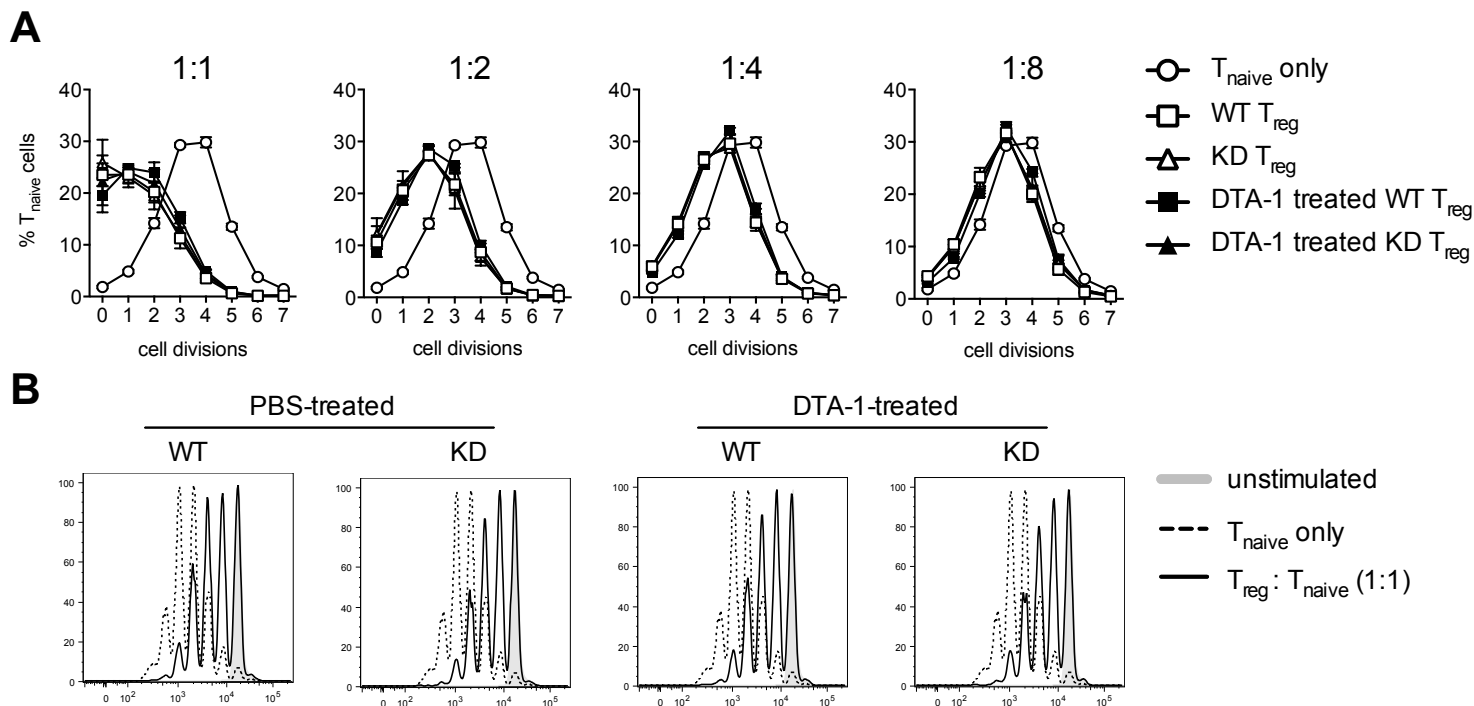

**Figure S1**

WT and *Ptpn22* KD Treg cells suppress the proliferation of naïve T cells *in vitro* equally well irrespective of DTA-1 pre-treatment. CD4<sup>+</sup>CD25<sup>+</sup> T cells were isolated from WT and *Ptpn22* transgenic mice 1 week after anti-GITR (DTA-1) injection. Mice received doxycycline for 4 weeks prior to GITR stimulation and until Treg cell purification 1 week later. Treg cells were mixed at different ratios with WT naïve CD4<sup>+</sup>CD62L<sup>+</sup> T cells labeled with a fixable eFluor450 proliferation dye and stimulated for 4 days in the presence of irradiated splenocytes and 1 μg/ml anti-CD3. Unstimulated naïve CD4<sup>+</sup> T cells and naïve CD4<sup>+</sup> T cells stimulated in the absence of Treg cells were used as controls. (A) Frequency of responding T cells that had undergone the indicated number of divisions at different Treg cell to naïve T cell ratios (1:1, 1:2, 1:4 and 1:8). (B) Representative histograms for the 1:1 ratio showing the dilution of proliferation dye as analyzed by flow cytometry. Mean values  $\pm$  SEM from 4 mice per group are shown. Data are representative of 2 experiments.

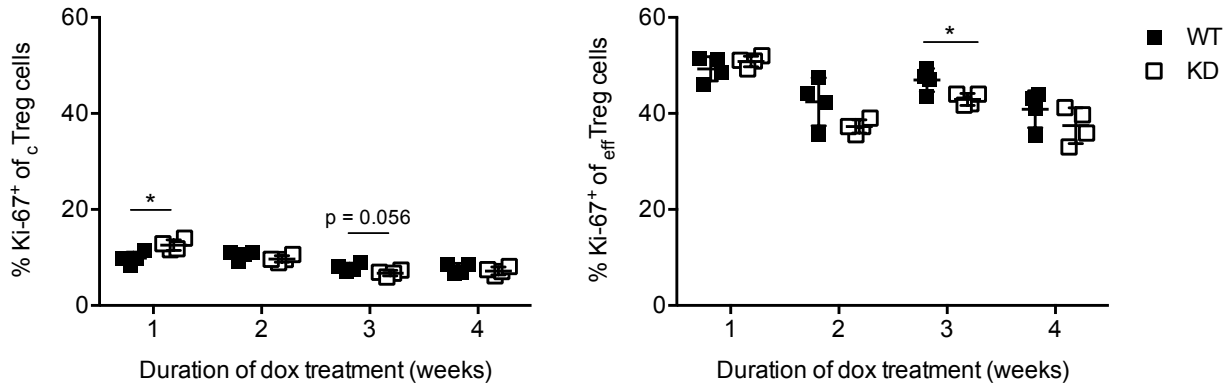

## Figure S2

*Ptpn22* silencing does not increase Treg cell proliferation. The frequency of Ki-67<sup>+</sup> cTreg (left panel) or effTreg cells (right panel) was measured in WT and *Ptpn22* KD mice 1, 2, 3 and 4 weeks after the start of doxycycline treatment. Results for 4 mice per group and per time-point are shown. Data are representative of 2 experiments. Error bars denote SEM. \*, p < 0.05.
